# Supplementary material for: Nitrogen-fixation catalyst based on graphene: every part counts
Source: Royal Society of Chemistry journal article supplement (doi:10.1039/c4cc01950d), 2014-05-07
Supplement: c4cc01950d1.pdf [file c4cc01950d1.pdf]

**Nitrogen-fixation catalyst based on graphene: every part counts**

**Yuan-Qi Le, Jia Gu, Wei Quan Tian\***

*State Key Laboratory of Urban Water Resource and Environment, Institute of  
Theoretical and Simulational Chemistry, Academy of Fundamental and  
Interdisciplinary Sciences, Harbin Institute of Technology, Harbin, 150080, P.*

*R. China*

*\*Corresponding author: [tianwq@hit.edu.cn](mailto:tianwq@hit.edu.cn)*

## Supporting Information

### Reference of Gaussian 03 package, B3LYP method, basis sets 6-31G(d,p) and SDD:

#### 1. Gaussian 03

Gaussian 03, Revision E.01, M. J. Frisch, G. W. Trucks, H. B. Schlegel, G. E. Scuseria, M. A. Robb, J. R. Cheeseman, J. A. Montgomery, Jr., T. Vreven, K. N. Kudin, J. C. Burant, J. M. Millam, S. S. Iyengar, J. Tomasi, V. Barone, B. Mennucci, M. Cossi, G. Scalmani, N. Rega, G. A. Petersson, H. Nakatsuji, M. Hada, M. Ehara, K. Toyota, R. Fukuda, J. Hasegawa, M. Ishida, T. Nakajima, Y. Honda, O. Kitao, H. Nakai, M. Klene, X. Li, J. E. Knox, H. P. Hratchian, J. B. Cross, V. Bakken, C. Adamo, J. Jaramillo, R. Gomperts, R. E. Stratmann, O. Yazyev, A. J. Austin, R. Cammi, C. Pomelli, J. W. Ochterski, P. Y. Ayala, K. Morokuma, G. A. Voth, P. Salvador, J. J. Dannenberg, V. G. Zakrzewski, S. Dapprich, A. D. Daniels, M. C. Strain, O. Farkas, D. K. Malick, A. D. Rabuck, K. Raghavachari, J. B. Foresman, J. V. Ortiz, Q. Cui, A. G. Baboul, S. Clifford, J. Cioslowski, B. B. Stefanov, G. Liu, A. Liashenko, P. Piskorz, I. Komaromi, R. L. Martin, D. J. Fox, T. Keith, M. A. Al-Laham, C. Y. Peng, A. Nanayakkara, M. Challacombe, P. M. W. Gill, B. Johnson, W. Chen, M. W. Wong, C. Gonzalez, and J. A. Pople, Gaussian, Inc., Wallingford CT, 2004.

#### 2. B3LYP

(a) C. Lee, W. Yang, and R. G. Parr, *Phys. Rev. B* 1988, **37**, 785-789. (b) A. D. Becke, *J. Chem. Phys.* 1993, **98**, 5648-5652.

### 3. 6-31G(d,p)

(a) W. J. Hehre, R. Ditchfield, and J. A. Pople, *J. Chem. Phys.* 1972, 56, 2257-2261. (b) G. A. Petersson, A. Bennett, T. G. Tensfeldt, M. A. Al-Laham, W. A. Shirley, and J. Mantzaris, *J. Chem. Phys.* 1988, **89**, 2193-2218.

### 4. SDD

D. Andrae, U. Haeussermann, M. Dolg, H. Stoll, and H. Preuss, *Theor. Chem. Acc.*, 1990, **77**, 123-141.

**Table S1.** The bond distance, bond angle of the MoN<sub>3</sub> part (the label of N atoms is shown in Figure S1) in C<sub>33</sub>H<sub>15</sub>MoN<sub>3</sub>, C<sub>69</sub>H<sub>21</sub>MoN<sub>3</sub> and C<sub>117</sub>H<sub>27</sub>MoN<sub>3</sub>.

| bond length                                       | Mo-N1 | Mo-N2 | Mo-N3 | Mo-N1N2 | Mo-N2N3 | Mo-N1N3 | NNN-Mo |
|---------------------------------------------------|-------|-------|-------|---------|---------|---------|--------|
| C <sub>33</sub> H <sub>15</sub> MoN <sub>3</sub>  | 1.96  | 1.96  | 1.96  | 91.3    | 91.3    | 91.3    | 53.8   |
| C <sub>69</sub> H <sub>21</sub> MoN <sub>3</sub>  | 1.96  | 1.96  | 1.96  | 91.3    | 91.3    | 91.3    | 53.8   |
| C <sub>117</sub> H <sub>27</sub> MoN <sub>3</sub> | 1.95  | 1.95  | 1.95  | 91.8    | 91.8    | 91.8    | 53.4   |

**Table S2.** The bond distances of the MoN<sub>3</sub> part (the label of N atoms is shown in Figure S1) of C<sub>33</sub>H<sub>15</sub>MoN<sub>3</sub>/N<sub>2</sub> and C<sub>69</sub>H<sub>21</sub>MoN<sub>3</sub>/N<sub>2</sub> before and after the addition of the first H<sup>+</sup> in the enzymatic catalytic reaction path.

| Bond                  | N <sub>2</sub> (ad)                              |                                                  | H1                                               |                                                  | H1R                                              |                                                  |
|-----------------------|--------------------------------------------------|--------------------------------------------------|--------------------------------------------------|--------------------------------------------------|--------------------------------------------------|--------------------------------------------------|
|                       | C <sub>33</sub> H <sub>15</sub> MoN <sub>3</sub> | C <sub>69</sub> H <sub>21</sub> MoN <sub>3</sub> | C <sub>33</sub> H <sub>15</sub> MoN <sub>3</sub> | C <sub>69</sub> H <sub>21</sub> MoN <sub>3</sub> | C <sub>33</sub> H <sub>15</sub> MoN <sub>3</sub> | C <sub>69</sub> H <sub>21</sub> MoN <sub>3</sub> |
| length                |                                                  |                                                  |                                                  |                                                  |                                                  |                                                  |
| Mo-N1                 | 2.11                                             | 2.10                                             | 2.13                                             | 2.12                                             | 2.07                                             | 2.07                                             |
| Mo-N2                 | 1.99                                             | 1.98                                             | 2.02                                             | 2.02                                             | 2.05                                             | 2.05                                             |
| Mo-N3                 | 1.99                                             | 1.98                                             | 2.02                                             | 2.00                                             | 2.05                                             | 2.05                                             |
| N $\alpha$ -N $\beta$ | 1.21                                             | 1.21                                             | 1.29                                             | 1.28                                             | 1.30                                             | 1.30                                             |
| Mo-N $\alpha$         | 2.02                                             | 2.02                                             | 1.90                                             | 1.97                                             | 1.91                                             | 1.91                                             |
| Mo-N $\beta$          | 2.04                                             | 2.03                                             | 2.01                                             | 1.98                                             | 2.04                                             | 2.04                                             |
| N $\beta$ -H          |                                                  |                                                  | 1.02                                             | 1.02                                             | 1.02                                             | 1.02                                             |

**Table S3.** Mulliken charge of the three groups (the division into three groups is illustrated in Figures S1 and S2) in  $C_{33}H_{15}MoN_3$ ,  $C_{69}H_{21}MoN_3$  and  $C_{117}H_{27}MoN_3$ .

| net charge           | grp3(t) | grp3(a) | grp2(t) | grp2(a) | Mo   | N1    | N2    | N3    |
|----------------------|---------|---------|---------|---------|------|-------|-------|-------|
| $C_{33}H_{15}MoN_3$  | 1.24    | 0.082   | 0.00    | 0.000   | 0.86 | -0.70 | -0.70 | -0.70 |
| $C_{69}H_{21}MoN_3$  | 1.74    | 0.083   | -0.43   | -0.006  | 0.90 | -0.73 | -0.73 | -0.73 |
| $C_{117}H_{27}MoN_3$ | 2.27    | 0.084   | -0.94   | -0.008  | 0.89 | -0.74 | -0.74 | -0.74 |

**Table S4.** Variation of Mulliken charge of different groups (grp) in Mo/N graphenes before and after loss of an electron.

| charge variation | $C_{33}H_{15}MoN_3$ | $C_{69}H_{21}MoN_3$ | $C_{117}H_{27}MoN_3$ |
|------------------|---------------------|---------------------|----------------------|
| grp1             | 0.05                | 0.03                | -0.02                |
| grp2             | 0.37                | 0.43                | 0.51                 |
| grp3             | 0.58                | 0.54                | 0.51                 |

**Table S5.** Reaction energies(kJ/mol), N-N bond length (Å) and bond order in the Schrock(Schrk) and enzymatic(Enzym) reaction as shown in Figure 3. Hn is the addition of the nth proton and HnR is the reduction after the nth protonation (as shown in Figure 6). The number (1-15) in parenthesis of reaction step is the order of reaction process in Figure 2. S in parenthesis stands for Schrock and E in parenthesis stands for enzymatic.

| Reaction step                  | Reaction energy |        | bond length/N-N |       | bond order/N-N |       | total bond order/Mo |       |
|--------------------------------|-----------------|--------|-----------------|-------|----------------|-------|---------------------|-------|
|                                | Schrk           | Enzym  | Schrk           | Enzym | Schrk          | Enzym | Schrk               | Enzym |
| N <sub>2</sub> +Mo(1)          | 0               | 0      |                 |       |                |       | 4.17                | 4.17  |
| N <sub>2</sub> (ad)(2)         | -104.1          | -143.9 | 1.13            | 1.21  | 2.58           | 2.03  | 4.53                | 4.94  |
| H1(3)                          | -131.1          | -156.0 | 1.23            | 1.29  | 1.75           | 1.53  | 4.81                | 5.28  |
| H1R(4)                         | -181.4          | -211.3 | 1.24            | 1.30  | 1.74           | 1.47  | 4.48                | 4.65  |
| H2(5)                          | -323.1          | -294.7 | 1.32            | 1.38  | 1.25           | 1.21  | 4.59                | 4.51  |
| H2R(6)                         | -331.6          | -326.4 | 1.33            | 1.39  | 1.20           | 1.18  | 4.79                | 4.93  |
| H3(7)                          | -228.2          | -420.4 | 1.44            | 1.42  | 0.97           | 1.05  | 4.73                | 4.59  |
| H3R(8)                         | -318.6          | -484.9 | 1.43            | 1.43  | 0.99           | 1.02  | 4.43                | 4.15  |
| H4(9)                          | -678.3          | -516.8 | 2.91            | 1.46  | 0.03           | 1.01  | 4.54                | 3.89  |
| H4R(10)                        | -682.2          | -497.0 | 3.01            | 1.46  | 0.02           | 1.00  | 4.73                | 4.33  |
| NH(S)/H5(E)(11)                | -661.3          | -789.8 |                 | 3.02  |                |       |                     |       |
| H5(S)/H5R(E)(12)               | -758.5          | -858.7 |                 | 3.09  |                |       |                     |       |
| H5R(S)/NH <sub>2</sub> (E)(13) | -839.0          | -839.0 |                 |       |                |       |                     |       |
| H6(14)                         | -898.8          | -898.8 |                 |       |                |       |                     |       |
| H6R(15)                        | -890.3          | -890.3 |                 |       |                |       |                     |       |

**Table S6.** Variation of Mulliken charge of the three groups (as shown in Figure 5) in the catalyst during the enzymatic protonation of N<sub>2</sub> (the charge difference of the present step from that of the previous step). The number in parenthesis is the average charge variation per atom. More effective numbers of digit is kept for some values for comparison.

| charge variation        | 1 <sup>st</sup> | 2 <sup>nd</sup> | 3 <sup>rd</sup>    | 4 <sup>th</sup>   | 5 <sup>th</sup> | 6 <sup>th</sup>   | average          |
|-------------------------|-----------------|-----------------|--------------------|-------------------|-----------------|-------------------|------------------|
| grp1<br>(active center) | 0.12<br>(0.03)  | 0.09<br>(0.02)  | 0.07<br>(0.02)     | -0.12<br>(-0.03)  | 0.14<br>(0.03)  | -0.16<br>(-0.04)  | 0.022<br>(0.006) |
| grp2<br>(transmitter)   | 0.05<br>(0.002) | 0.02<br>(0.001) | -0.048<br>(-0.002) | -0.06<br>(-0.002) | 0.23<br>(0.01)  | -0.04<br>(-0.002) | 0.025<br>(0.001) |
| grp3<br>(reservoir)     | 0.75<br>(0.031) | 0.79<br>(0.03)  | 0.65<br>(0.027)    | 0.66<br>(0.03)    | 1.00<br>(0.04)  | 0.66<br>(0.03)    | 0.75<br>(0.031)  |
| total                   | 0.92            | 0.90            | 0.67               | 0.48              | 1.37            | 0.46              | 0.80             |

**Table S7.** Variation of Mulliken charge (the charge difference of the present step from that of the previous step) of the three groups (shown in Figure 5) in the catalyst during the enzymatic reduction.

| charge variation        | 1 <sup>st</sup>   | 2 <sup>nd</sup>   | 3 <sup>rd</sup>  | 4 <sup>th</sup>   | 5 <sup>th</sup>   | 6 <sup>th</sup>   | average           |
|-------------------------|-------------------|-------------------|------------------|-------------------|-------------------|-------------------|-------------------|
| grp1<br>(active center) | -0.04<br>(-0.01)  | -0.07<br>(-0.02)  | -0.09<br>(-0.02) | -0.05<br>(-0.01)  | -0.04<br>(-0.01)  | -0.06<br>(-0.02)  | -0.06<br>(-0.02)  |
| grp2<br>(transmitter)   | -0.02<br>(-0.001) | -0.08<br>(-0.003) | 0.03<br>(0.001)  | -0.08<br>(-0.003) | -0.07<br>(-0.003) | -0.09<br>(-0.004) | -0.05<br>(-0.002) |
| grp3<br>(reservoir)     | -0.82<br>(-0.03)  | -0.79<br>(-0.03)  | -0.79<br>(-0.03) | -0.82<br>(-0.03)  | -0.84<br>(-0.04)  | -0.83<br>(-0.04)  | -0.81<br>(-0.03)  |
| total                   | -0.88             | -0.94             | -0.85            | -0.95             | -0.95             | -0.98             | -0.92             |

**Table S8.** Variation of natural charge of the three groups (as shown in Figure 5) in the catalyst during the enzymatic protonation of  $N_2$  (the charge difference of the present step from that of the previous step) in  $C_{33}H_{15}MoN_3$ .

| charge variation     | 1 <sup>st</sup> | 2 <sup>nd</sup> | 3 <sup>rd</sup> | 4 <sup>th</sup> | 5 <sup>th</sup> | 6 <sup>th</sup> |
|----------------------|-----------------|-----------------|-----------------|-----------------|-----------------|-----------------|
| grp1 (active center) | -0.13           | 0.04            | 0.03            | -0.01           | 0.26            | -0.12           |
| grp2 (transmitter)   | 0.26            | -0.03           | 0.00            | -0.04           | 0.12            | -0.15           |
| grp3 (reservoir)     | 1.04            | 0.78            | 0.62            | 0.52            | 1.22            | 0.74            |
| total                | 1.17            | 0.79            | 0.65            | 0.47            | 1.6             | 0.47            |

**Table S9.** Variation of natural charge (the charge difference of the present step from that of the previous step) of the three groups (shown in Figure 5) in the catalyst during the enzymatic reduction.

| charge variation     | 1 <sup>st</sup> | 2 <sup>nd</sup> | 3 <sup>rd</sup> | 4 <sup>th</sup> | 5 <sup>th</sup> | 6 <sup>th</sup> |
|----------------------|-----------------|-----------------|-----------------|-----------------|-----------------|-----------------|
| grp1 (active center) | 0.01            | -0.02           | -0.04           | -0.17           | 0.04            | -0.06           |
| grp2 (transmitter)   | -0.03           | -0.02           | -0.13           | -0.12           | -0.004          | 0.00            |
| grp3 (reservoir)     | -0.85           | -0.86           | -0.76           | -0.69           | -1.00           | -0.92           |
| total                | -0.87           | -0.90           | -0.93           | -0.95           | -0.95           | -0.98           |



**Table S10.** Mulliken charge of the three groups (as shown in Figure 5) in the catalyst during the reaction steps.

| Reaction step                  | grp1  |         | grp2  |         | grp3  |         | N <sub>2</sub> +H |         | total |
|--------------------------------|-------|---------|-------|---------|-------|---------|-------------------|---------|-------|
|                                | total | average | total | average | total | average | total             | average |       |
| N <sub>2</sub> +Mo(1)          | -1.24 | -0.309  | 1.58  | 0.067   | -0.34 | -0.014  |                   |         | 0.0   |
| N <sub>2</sub> (ad)(2)         | -1.13 | -0.284  | 1.62  | 0.067   | -0.23 | -0.010  | -0.25             | -0.125  | 0.0   |
| H1(3)                          | -0.89 | -0.223  | 1.75  | 0.073   | 0.54  | 0.023   | -0.40             | -0.132  | 1.0   |
| H1R(4)                         | -0.95 | -0.237  | 1.71  | 0.071   | -0.29 | -0.012  | -0.48             | -0.159  | 0.0   |
| H2(5)                          | -0.90 | -0.226  | 1.76  | 0.073   | 0.52  | 0.022   | -0.38             | -0.095  | 1.0   |
| H2R(6)                         | -0.97 | -0.243  | 1.69  | 0.070   | -0.62 | -0.011  | -0.45             | -0.112  | 0.0   |
| H3(7)                          | -0.91 | -0.226  | 1.64  | 0.068   | 0.39  | 0.016   | -0.12             | -0.023  | 1.0   |
| H3R(8)                         | -0.99 | -0.248  | 1.67  | 0.070   | -0.40 | -0.017  | -0.28             | -0.056  | 0.0   |
| H4(9)                          | -1.11 | -0.278  | 1.61  | 0.067   | 0.26  | 0.011   | 0.24              | 0.040   | 1.0   |
| H4R(10)                        | -1.17 | -0.292  | 1.53  | 0.064   | -0.56 | -0.023  | 0.20              | 0.032   | 0.0   |
| NH(S)/H5(E)(11)                | -1.03 | -0.257  | 1.76  | 0.073   | 0.44  | 0.018   | -0.17             | -0.024  | 1.0   |
| H5(S)/H5R(E)(12)               | -1.07 | -0.267  | 1.69  | 0.070   | -0.40 | -0.017  | -0.22             | -0.031  | 0.0   |
| H5R(S)/NH <sub>2</sub> (E)(13) | -1.04 | -0.259  | 1.70  | 0.071   | -0.34 | -0.014  | -0.33             | -0.110  | 0.0   |
| H6(14)                         | -1.18 | -0.294  | 1.65  | 0.069   | 0.32  | 0.013   | 0.21              | 0.052   | 1.0   |
| H6R(15)                        | -1.24 | -0.309  | 1.56  | 0.065   | -0.51 | -0.021  | 0.19              | 0.047   | 0.0   |

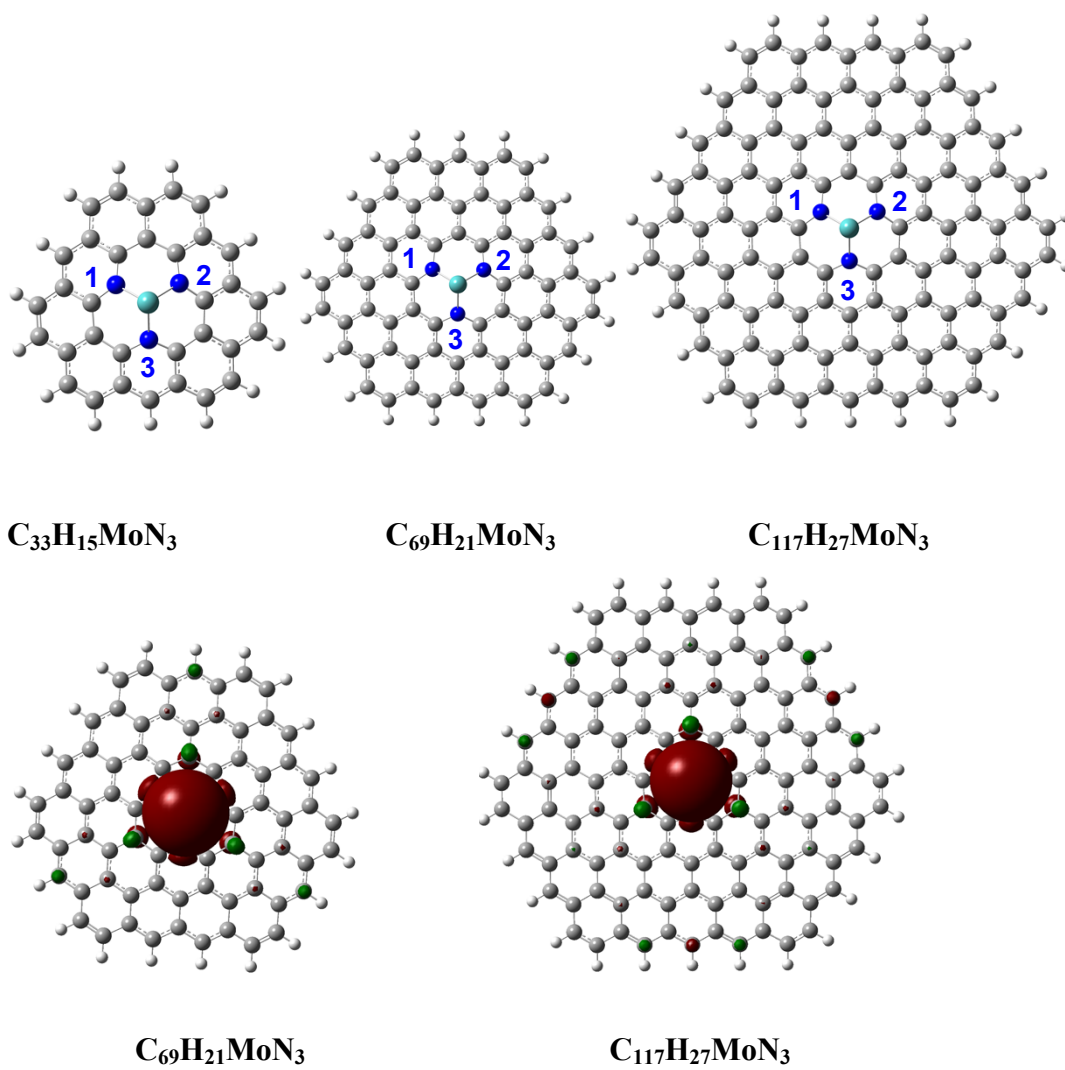

**Figure S1.** Three models for the Mo/N-doped graphene catalyst and the lowest unoccupied molecular orbital of Mo/N-doped graphenes ( $C_{69}H_{21}MoN_3$  and  $C_{117}H_{27}MoN_3$ ).

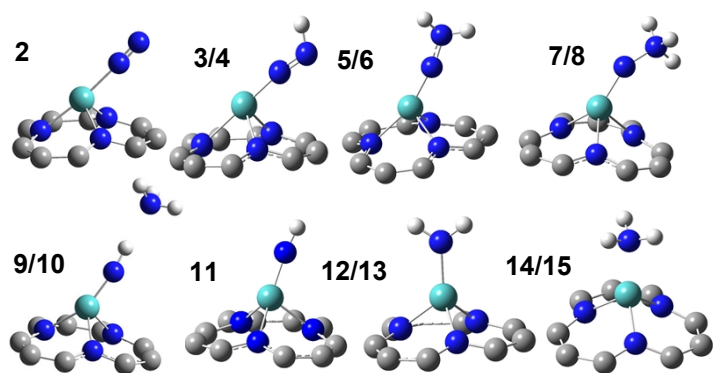

**Figure S2.** The structures of the intermediates in the Schrock reaction path. 2-N<sub>2</sub> adsorption, 3/4-1<sup>st</sup> hydrogenation (protonation and reduction), 5/6-2<sup>nd</sup> hydrogenation, 7/8-3<sup>rd</sup> hydrogenation, 9/10-4<sup>th</sup> hydrogenation, 11-ammonia desorption, 12/13-5<sup>th</sup> hydrogenation, 14/15-6<sup>th</sup> hydrogenation. The number of intermediate is the same to that in Fig. 2. (N in blue, C in gray, H in white, Mo in light blue).

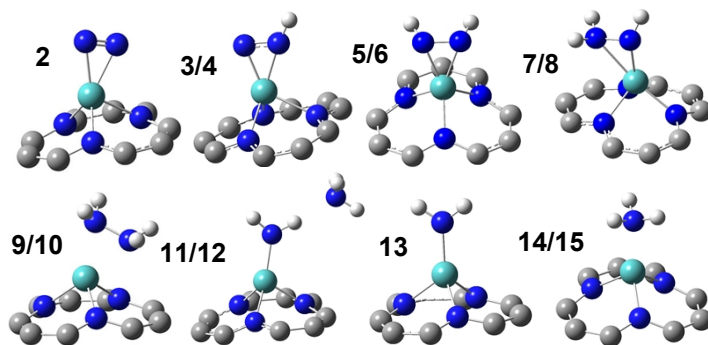

**Figure S3.** The structures of the intermediates in the enzymatic reaction path. 2-N<sub>2</sub> adsorption, 3/4-1<sup>st</sup> hydrogenation (protonation and reduction), 5/6-2<sup>nd</sup> hydrogenation, 7/8-3<sup>rd</sup> hydrogenation, 9/10-4<sup>th</sup> hydrogenation, 11/12-5<sup>th</sup> hydrogenation, 13-ammonia desorption, 14/15-6<sup>th</sup> hydrogenation. The number of intermediate is the same to that in Fig. 2. (N in blue, C in gray, H in white, Mo in light blue).

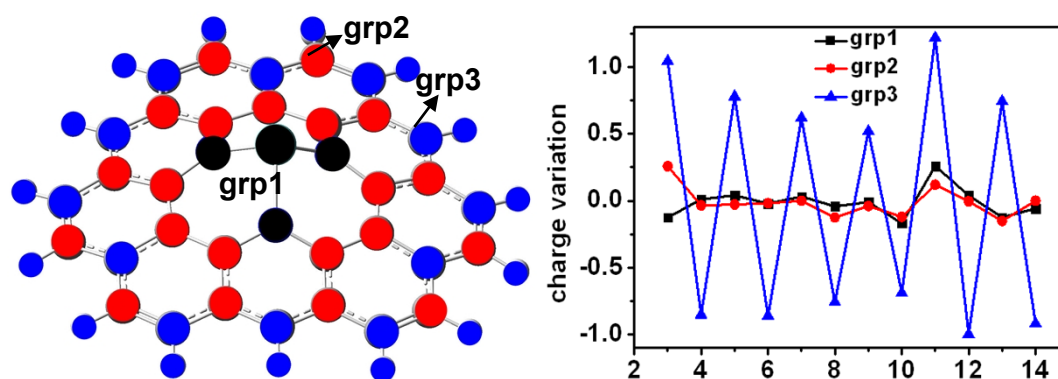

**Figure S4.** The variation of natural charge (the charge difference of the present step from that of the previous step) of different groups (grp) in Mo/N graphene ( $C_{33}H_{15}MoN_3$ ) during the enzymatic catalytic  $N_2$  fixation. The numbering of the reaction steps is shown in Figure 2.

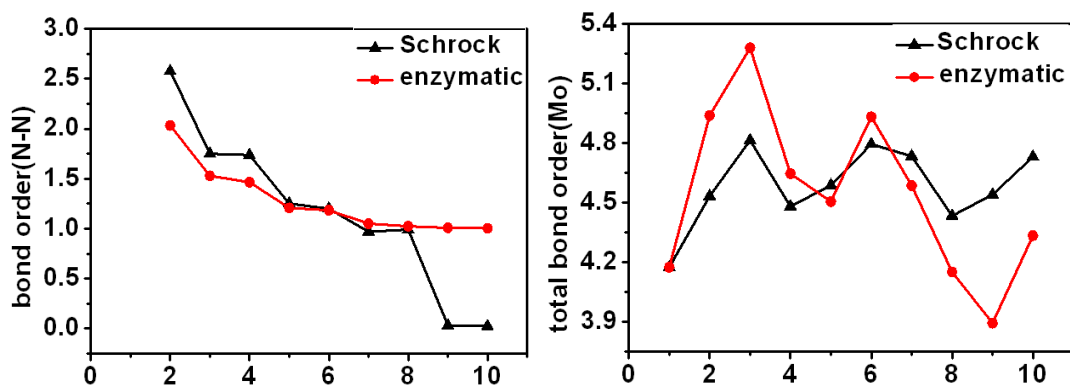

**Figure S5.** The N-N bond order and the total bond order of Mo during the N<sub>2</sub> fixation in the Schrock and enzymatic reaction paths. 1-catalyst, 2-N<sub>2</sub> adsorption, 3/4-1<sup>st</sup> hydrogenation (protonation and reduction), 5/6-2<sup>nd</sup> hydrogenation, 7/8-3<sup>rd</sup> hydrogenation, 9/10-4<sup>th</sup> hydrogenation.
